## Corrigendum

**Woods, A. H., Bonnecaze, R. T. and Zrubek, B.** (2005). Oxygen and water flux across eggshells of *Manduca sexta*. *J. Exp. Biol.* **208**, 1297-1308.

In both the on-line and print versions of this paper, the left hand y axis of Fig. 6A was labelled incorrectly as:

Water vapour flux  $\times 10^6$  (mol s<sup>-1</sup> m<sup>-2</sup>).

The correct label should read:

Water vapour flux  $\times 10^5$  (mol s<sup>-1</sup> m<sup>-2</sup>).

The error does not affect any of the conclusions of the paper and the authors apologise for any inconvenience caused.

## Oxygen and water flux across eggshells of *Manduca sexta*

H. Arthur Woods<sup>1,\*</sup>, Roger T. Bonneau<sup>2</sup> and Brandy Zrubek<sup>1</sup>

<sup>1</sup>Section of Integrative Biology, The University of Texas at Austin, Austin, TX 78712, USA and  
<sup>2</sup>Department of Chemical Engineering, The University of Texas at Austin, Austin, TX 78712, USA

\*Author for correspondence (e-mail: art.woods@mail.utexas.edu)

Accepted 28 January 2005

### Summary

Insect eggs must obtain oxygen across the eggshell to support embryonic development. Because eggs are small, obtaining enough oxygen would seem trivial. Recent work, however, has shown that eggs of a moth, *Manduca sexta*, are oxygen limited at high but realistic temperatures (32–37°C) and that  $P_{O_2}$  drops steeply across the eggshell. Here we use theoretical and experimental approaches to partition the total resistance to oxygen flux among several steps in the oxygen cascade from environment to embryo. Standard mass-transfer analysis suggests that boundary layers of air around eggs, and around substrates to which they are attached, offer negligible resistance. Likewise, a mathematical model, parameterized using published and newly obtained morphological data, predicts that air-filled parts of the chorion also do not resist oxygen flux. This prediction was confirmed by experiments that measured rates of carbon dioxide emission from batches of eggs subjected simultaneously to hypoxia and inert gas substitution: depression of metabolic rate by hypoxia was not rescued when the diffusion coefficient of oxygen in air

was doubled by substituting helium for nitrogen. The model did predict, however, that a set of subchoral layers (a crystalline chorionic layer, a wax layer and the vitelline membrane) could account for most or all of the total resistance to oxygen flux. Support for this prediction was obtained from two sequential experiments. First, eggs extracted with chloroform:methanol had highly elevated rates of water loss, suggesting that indeed eggs of *M. sexta* are waterproofed by wax. Second, rates of water loss and carbon dioxide emission from batches of eggs, measured from laying to hatching, changed in parallel over development. These data suggest that a single layer, likely a wax layer or a combination of wax and other subchoral layers, provides the main resistance to water efflux and oxygen influx.

Key words: eggshell, oxygen, water, tradeoff, inert gas substitution, chorion, wax, crystalline chorionic layer, oxygen limitation, mathematical model, moth, *Manduca sexta*.

### Introduction

At oviposition, eggs of most insects contain all the materials and energy necessary for embryonic development, with the exception of oxygen. Obtaining oxygen would seem trivial; insect eggs are small and oxygen should diffuse rapidly from one point to another (Schmidt-Nielsen, 1984). Moreover, the literature on avian eggs would seem to support such a conclusion. Bird embryos also obtain oxygen by diffusion across an eggshell (Wangensteen and Rahn, 1970/1971). However, avian egg masses range from about 9 kg in the extinct *Aepyornis* down to 200–300 mg in some hummingbirds (Rahn and Ar, 1974), whereas insect eggs range from around 10 mg down to tens of  $\mu\text{g}$  (Hinton, 1981). Insect eggs therefore support much smaller volumes of metabolizing tissues with much higher surface-to-volume ratios; oxygen delivery should be easy.

Recently, Woods and Hill (2004) showed for eggs of a sphingid moth, *Manduca sexta*, that this is not so. Eggs developed more slowly in even moderate hypoxia ( $P_{O_2}$  9–15 kPa) and did not survive extended exposure to  $P_{O_2}$

<9 kPa. Egg metabolic rates, measured as  $\text{CO}_2$  emission, were depressed by hypoxia and stimulated by hyperoxia and the effect of  $P_{O_2}$  was stronger at higher temperatures. The work presented here asks: what is the identity and structure of the layer(s) resisting oxygen flux between environment and embryo? *A priori*, we suspect that the main resistance is associated with one or more layers of the eggshell, as these were the location of the steepest  $P_{O_2}$  gradient (Woods and Hill, 2004). To evaluate possible answers in a formal framework, we develop here a mathematical model of gas flux between embryo and environment. The model contains a series of resistances, each corresponding to one or more eggshell layers. With additional theory and a set of data on egg morphology and physiology, we derive quantitative estimates of the resistances – finding that most of it can be localized to one or a few layers beneath the chorion. The same layers also resist outward flux of water vapour, suggesting that these layers are the physical locus of an oxygen–water tradeoff.

### Structure of insect eggs

The model focuses on eggshell layers common to most insect orders (Hinton, 1981; Margaritis, 1985), but with particular reference to eggs of Diptera (Margaritis et al., 1980) and Lepidoptera (Fehrenbach et al., 1987; Fehrenbach, 1995) and additional information specific to *M. sexta* (Dorn et al., 1987; Lamer and Dorn, 2001). One could, in such a model, include explicit terms describing each distinct eggshell layer – but there are too many (Fig. 1A) with poorly known properties. Our approach, therefore, is to collapse sets of layers into a few ‘functional layers.’ We do not model plastron respiration, but such a layer could easily be added following the work of Thorpe and Crisp (1947).

The outermost layer relevant to gas exchange is the boundary layer of air around the egg. The thickness of this layer depends on wind speed around the egg and on its oviposition substrate (e.g. leaf, stem, soil). We model mass transfer of oxygen through this layer with standard equations.

The outermost component of the eggshell itself is the chorion (Fig. 1A), which is composed primarily of protein. Chorion thickness varies among species from thin (<1  $\mu\text{m}$  in *Drosophila*) to very thick (>40  $\mu\text{m}$  in some saturniid moths;

Margaritis, 1985). In *M. sexta*, the chorion is 7–8  $\mu\text{m}$  thick (Orfanidou et al., 1992). Chorions of most species are penetrated by aeropyles: air-filled, hydrofuge tubes of radii  $\sim 1 \mu\text{m}$ , which are conduits for gases diffusing between embryo and environment (Hinton, 1981). At the base of the chorion, the aeropyles open into a thin trabecular layer (TL; Fig. 1A) – so-called because it is an interconnected series of vaulted chambers. This layer is thin (often <0.5  $\mu\text{m}$  thick) and air-filled, and it extends over most or all of the surface area of the egg. Both chorion and trabecular layer are deposited by maternal follicular cells.

Beneath these layers are a crystalline chorionic layer (CCL), a wax layer and the vitelline envelope (VE; Fig. 1A). These layers constitute a set – they also are secreted by maternal follicular cells and are closely apposed (Margaritis et al., 1980). A CCL has been found in most of the insect species examined for it (eggs of *M. sexta* have not been examined) (Furneau and Mackay, 1972; Margaritis et al., 1979; Margaritis and Mazzini, 1998; Papassideri et al., 2003). In *D. melanogaster*, the layer is  $\sim 40 \text{ nm}$  thick (Papassideri and Margaritis, 1996) and in *Leptinotarsa decemlineata* it is  $\sim 1 \mu\text{m}$  thick (Papassideri et al., 2003). For most other species studied, CCL thickness lies between these extremes (Margaritis, 1985). The crystallized repeating units, likely proteins, exhibit a periodicity of about 10 nm in *D. melanogaster* (Papassideri et al., 2003) and similar spacing in other species (Margaritis, 1985). Papassideri and Margaritis (1996) suggesting that in *Drosophila* the layer controls water movement across the eggshell; if so, it could conceivably also affect oxygen flux. Unfortunately, no experimental data on CCL permeability to water or oxygen are available for any insect. Among the layers neglected in the model, the gas exchange properties of this one are potentially the most interesting.

Below the CCL is a thin wax layer (Fig. 1A). Waxes were first proposed as waterproofing agents in insect eggs over 50 years ago (Beament, 1946; Slifer, 1948) and have since been identified in a number of insect orders (Margaritis,

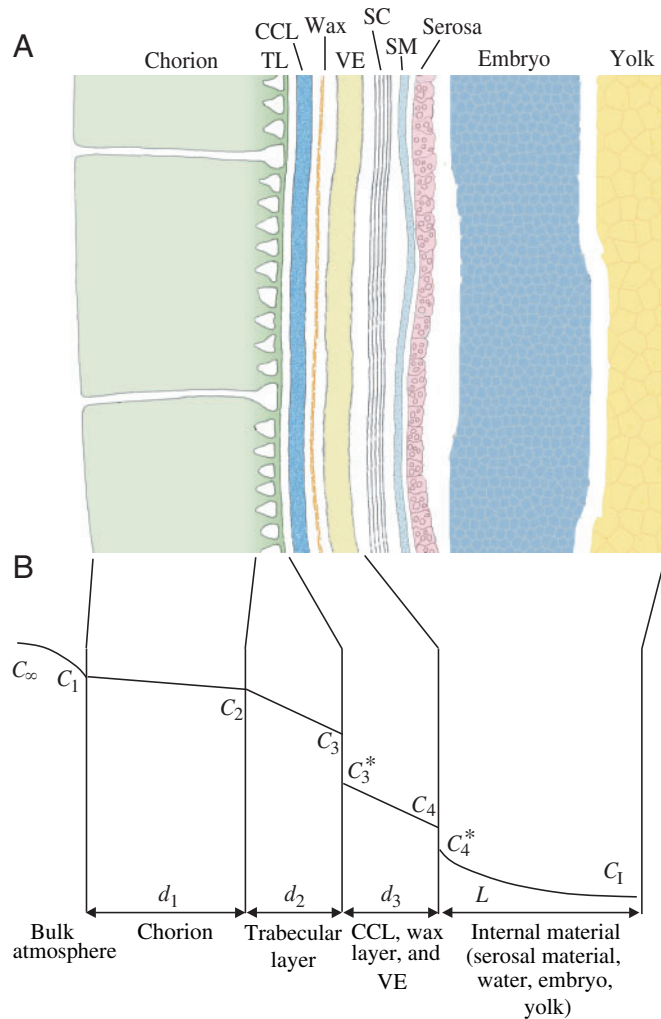

Fig. 1. (A) Schematic of an insect eggshell, drawn from published information on *Manduca* and *Drosophila*. Features are not to scale. From left to right, the layers are: chorion, trabecular layer (TL), crystalline chorionic layer (CCL), wax layer, vitelline envelope (VE), serosal cuticle (SC), serosal membrane (SM), serosa, embryo, yolk. From the VE outwards, all layers are in place at oviposition, having been secreted by maternal follicular cells. By contrast, the SC and SM are secreted from the serosa, which is derived from the blastoderm. The SC is secreted first, starting at about 12 h after oviposition (at 24°C), followed by the SM from 23–44 h after oviposition (Lamer and Dorn, 2001). The embryo develops closely apposed to the serosa (rather than deep within the yolk), both before and after katatrepsis. The yolk itself becomes cellularized in the first 12 h after oviposition (Lamer and Dorn, 2001). (B) Schematic of gas flux model. The model terms represent the characteristics of five different layers or sets of layers. From left to right they are: boundary layers around the egg or its substrate, chorion, trabecular layers, a combination of the CCL, wax layer and VE, and all remaining interior layers.

Table 1. Definition of symbols and their values

| Symbol           | Meaning                                              | Units                                             | Value                 |
|------------------|------------------------------------------------------|---------------------------------------------------|-----------------------|
| $a$              | Measured equatorial axis of egg of <i>M. sexta</i>   | m                                                 | $7.84 \times 10^{-4}$ |
| $c$              | Measured polar axis of egg of <i>M. sexta</i>        | m                                                 | $6.84 \times 10^{-4}$ |
| $C_i$            | Concentration of oxygen at position $i$              | $\text{mol m}^{-3}$                               |                       |
| $C_\infty$       | Concentration of oxygen in bulk atmosphere (at 25°C) | $\text{mol m}^{-3}$                               | 8.583                 |
| $D_{\text{air}}$ | Diffusion coefficient of oxygen in air               | $\text{m}^2 \text{s}^{-1}$                        | $2.09 \times 10^{-5}$ |
| $D_i$            | Diffusion coefficient in layer $i$                   | $\text{m}^2 \text{s}^{-1}$                        |                       |
| $d_i$            | Thickness of layer $i$                               | m                                                 |                       |
| $e$              | Ellipticity                                          | None                                              | 0.489                 |
| $H_i$            | Thermodynamic partition coefficient                  | None                                              |                       |
| $J$              | Flux of oxygen into an egg of <i>M. sexta</i>        | $\text{mol s}^{-1} \text{m}^{-2}$                 | $1.09 \times 10^{-6}$ |
| $k_E$            | External mass transfer coefficient                   | $\text{m s}^{-1}$                                 |                       |
| $k_I$            | Internal mass transfer coefficient                   | $\text{m s}^{-1}$                                 |                       |
| $k_m$            | Overall mass transfer coefficient                    | $\text{m s}^{-1}$                                 | $1.9 \times 10^{-7}$  |
| $K$              | Permeability coefficient                             | $\text{mol s}^{-1} \text{m}^{-2} \text{kPa}^{-1}$ |                       |
| $L$              | Characteristic length of leaf                        | m                                                 | 0.1                   |
| $l$              | Average distance between aeropyles                   | m                                                 | $3 \times 10^{-5}$    |
| $R$              | Radius of an egg if it were perfectly spherical      | m                                                 | $7.5 \times 10^{-4}$  |
| $r$              | Radius of a single aeropyle                          | m                                                 |                       |
| $S$              | Surface area of <i>Manduca</i> egg                   | $\text{m}^2$                                      | $7.07 \times 10^{-6}$ |
| $v$              | Wind speed                                           | $\text{m s}^{-1}$                                 |                       |
| $\alpha$         | Fraction of chorion surface occupied by aeropyles    | None                                              | $1.39 \times 10^{-4}$ |
| $\beta$          | Capacitance coefficient                              | $\text{mol m}^{-3} \text{kPa}^{-1}$               |                       |
| $\varepsilon$    | Fraction of trabecular layer that is air             | None                                              | 0.7                   |
| $\nu$            | Kinematic viscosity of air                           | $\text{m}^2 \text{s}^{-1}$                        | $1.6 \times 10^{-5}$  |
| $\tau$           | Tortuosity of trabecular layer                       | None                                              | 4                     |

1985), including Heteroptera, Diptera and Lepidoptera. Papassideri et al. (1991), in a detailed analysis of the structure of the wax in layer in *D. melanogaster*, showed that it was only ~5 nm thick and consisted of individual plaques of wax, each 0.5–1.0  $\mu\text{m}$  in diameter, compressed between the overlying CCL and underlying VE (and possibly intercalated with them, Papassideri et al., 1991). Wax layers from non-drosophilids are poorly known, although they have been identified in a number of Lepidoptera (Telfer and Smith, 1970; Cruikshank, 1972; Salkeld, 1973; Barbier and Chauvin, 1974). Wax plates similar to those of *Drosophila* are seen in eggs of *Galleria mellonella* (Pyralidae) (Barbier and Chauvin, 1974). Each plate is ~10 nm thick and three or more plates may partially overlap. The total thickness of the wax layer appears to be <50 nm in most species. VE-associated waxes extracted from dechorionated eggs of six species of Diptera were composed primarily of *n*-alkanes and methyl-branched alkanes (Nelson and Leopold, 2003), similar in composition to the epicuticular waxes of pupae and adults. The wax layer in eggs of *M. sexta* has not been analyzed in comparable detail. Nelson and Sukkestad (1970) extracted total lipids from batches of *Manduca* eggs ( $59.5 \mu\text{g egg}^{-1}$ ), from which a hydrocarbon fraction ( $3.1 \mu\text{g egg}^{-1}$ ) was isolated. The hydrocarbons, which are thought to be VE-associated, were 50% *n*-alkanes (27- and 29-carbon) with the remainder primarily dimethylalkanes. Egg waxes likely also contain polar lipids of the kinds found by Buckner et al. (1984) in surface waxes of pupal *M. sexta*.

The VE (vitelline envelope) itself usually is thick (several  $\mu\text{m}$ ) before oviposition (e.g. Salkeld, 1973), but it compresses afterwards and may be very thin (e.g. <0.5  $\mu\text{m}$ , Barbier and Chauvin, 1977; Margaritis, 1985; Fehrenbach et al., 1987) by midway through development. Its permeability has not been measured but it is probably high, as brief extraction of *Drosophila* VE with wax-removing solvents (leaving the VE itself) renders the egg much more permeable to water (Schreuders et al., 1996). Biemont et al. (1981) suggest that eggs of the beetle *Acanthoscelides obtectus* are protected by a dense vitelline envelope, although they present no supporting experimental evidence. For model construction, we focus on the CCL, wax and VE layers as a functional unit (Fig. 1B), both because we have no way, practically, of manipulating them independently and because numerous authors have suggested that the layers may act as a single unit – e.g. that there is intercalation of wax into the VE (Margaritis, 1985) or that the crystalline layer organizes wax (Papassideri and Margaritis, 1996).

After oviposition, additional layers (serosal cuticle, serosal membrane, serosa, embryonic cuticle and tissue) develop or are secreted in a complicated spatiotemporal pattern beneath the VE. Excellent descriptions of these layers in *M. sexta* are given by Dorn et al. (1987), Lamer and Dorn (2001) and Berger-Twelbeck et al. (2003). Although one or more of these layers may be relevant to gas exchange, at present too little is known about them to afford more than guesses about their individual permeabilities. For simplicity, we model all of the subvitelline

layers as a single material (Fig. 1B). Finally, the characteristics of yolk may be important to gas exchange, although the bulk of yolk lies to the interior of the embryo. In *M. sexta*, yolk does become cellular (Lamer and Dorn, 2001) and presumably consumes oxygen.

#### Gas flux model

The first serious attempt to model oxygen flux into insect eggs was by Tuft (1950), who experimented with eggs of the bug *Rhodnius prolixus*. Eggs of this species obtain oxygen only through a set of pores (pseudomicropyles) located near the rim cap end of the egg. Using simple equations for the penetration of O<sub>2</sub> into tissues of different geometry, Tuft (1950) showed that eggs could obtain sufficient oxygen only if the trabecular layer was air-filled and extended over the whole egg surface under the chorion. Later, Hartley (1971) used detailed measurements of the chorion of eggs of a tettigoniid (*Homorocoryphus nitidulus vicinus*) to parameterize a flux model through the outer chorion. He concluded that water-filled, but not air-filled, parts of the chorion resist oxygen movement. Recently, Daniel and Smith (1994) developed equations describing the diffusive resistance of the single aeropyle in eggs of a bruchid beetle, *Callosobruchus maculatus*. None of the efforts to understand gas exchange by insect eggs approaches the sophistication and detail of efforts for bird eggs (see especially Wangenstein et al., 1970/1971; Wangenstein and Rahn, 1970/1971; Paganelli et al., 1975; Paganelli, 1980).

Our model is the first to consider individual layers explicitly. Consider a shell composed of three layers (Fig. 1B; Table 1), each with a diffusive resistance to mass-transfer of gas. The first two layers, the chorion and trabecular layer, contain air-filled pores of differing microstructure. The third, representing a composite of crystalline chorionic layer, wax and vitelline envelope, is considered to be a solid into which diffusing gas may dissolve. In addition, on the outside and inside of the layers described there may be additional resistance to mass-transfer – e.g. resistance by boundary layers of still air around the egg or from liquid between the bottom-most eggshell layer and the embryo. Note that at the interface between the second porous layer and adjoining third solid layer, there is a thermodynamic partitioning of the gases. Likewise, there is thermodynamic partitioning at the interface between the third, solid layer and the liquid interior of the egg. Throughout, our model refers to gas concentrations rather than partial pressures (see Appendix 1 in supplementary material, which shows how to convert between them).

If the thickness of each layer ( $d_i$ ) is much less than the radius of curvature,  $R$ , we can neglect the effects of curvature and model the mass-transfer as occurring in one Cartesian direction (Fig. 1B; Hartley, 1971). At steady state, the flux  $J$  through each of the five regions (one external, three diffusive layers and one internal) is constant and is given by the expressions:

$$J = k_E (C_\infty - C_1), \quad J = \frac{D_1}{d_1} (C_1 - C_2), \quad J = \frac{D_2}{d_2} (C_2 - C_3), \\ J = \frac{D_3}{d_3} (C_3^* - C_4), \quad J = k_1 (C_4^* - C_1), \quad (1a-e)$$

where  $D_i$  is the diffusion coefficient of the gas in the  $i$ th layer of the shell,  $k_E$  and  $k_1$  are external and internal mass-transfer coefficients. The concentrations  $C_i$  of the diffusing species occur at the locations indicated in Fig. 1B. Asterisks indicate shifts in concentration due to thermal partitioning from one phase (e.g. air) into another (e.g. solid wax).

Assuming a linear thermodynamic relationship,  $C_3 = H_3 C_3^*$  and  $C_4 = H_4 C_4^*$ , where  $H_3$  and  $H_4$  are constants (partition coefficients) and rearranging the terms above so the right-hand side involves only differences in concentration, one finds that:

$$\frac{J}{k_E} = C_\infty - C_1, \quad \frac{Jd_1}{D_1} = C_1 - C_2, \quad \frac{Jd_2}{D_2} = C_2 - C_3, \\ \frac{Jd_3H_3}{D_3} = C_3 - H_3C_4, \quad \frac{JH_3H_4}{k_1} = H_3C_4 - H_3H_4C_1. \quad (2a-e)$$

Summing the last five equations cancels all concentrations except  $C_\infty$  and  $C_1$ , giving the following flux equation:

$$J = \left( \frac{1}{k_E} + \frac{d_1}{D_1} + \frac{d_2}{D_2} + \frac{d_3H_3}{D_3} + \frac{H_3H_4}{k_1} \right)^{-1} (C_\infty - H_3H_4C_1). \quad (3)$$

Note that this expression can also be written as

$$J = k_m (C_\infty - H_3H_4C_1), \quad (4)$$

where the overall mass-transfer coefficient is  $k_m$  is given by:

$$k_m = \left( \frac{1}{k_E} + \frac{d_1}{D_1} + \frac{d_2}{D_2} + \frac{d_3H_3}{D_3} + \frac{H_3H_4}{k_1} \right)^{-1}. \quad (5)$$

Below, using both experiments and additional theory, we derive quantitative estimates for the resistance of each of the main eggshell layers to oxygen flux.

#### How large is a large resistance?

Equation 5 shows that the overall mass transfer coefficient  $k_m$  is the reciprocal of a sum of individual resistances, each corresponding to a different diffusion step. Evaluating whether individual resistances are large requires a benchmark for comparison. We therefore calculated the value of  $k_m$  that would depress the internal concentration of oxygen  $C_1$  to the values observed by Woods and Hill (2004). In particular, 3-day-old eggs at 24°C had minimum, central  $P_{O_2}$  levels of approximately 2 kPa as measured by an O<sub>2</sub> microelectrode, or about 10% of atmospheric  $P_{O_2}$  at sea level (~21 kPa). If we assume the egg's liquid contents are mostly water, then at air saturation the contents would contain 0.255 mol m<sup>-3</sup> (Denny, 1993); thus, at 10% of saturation,  $C_1 = 0.0255$  mol m<sup>-3</sup>. Equation 4 can be rearranged to give:

$$k_m = \frac{J}{C_\infty - C_1 H_3 H_4}, \quad (6)$$

$C_\infty$  is known and  $J$  can be calculated from data in Woods and Hill (2004), who found that the average 3-day-old egg (at 25°C, weighing 1.56 mg) emitted carbon dioxide at a rate of  $6.5 \times 10^{-12} \text{ mol s}^{-1}$ . Assuming a respiratory quotient of 0.84 (Alleyne et al., 1997), it consumed  $\text{O}_2$  at a rate of  $7.7 \times 10^{-12} \text{ mol s}^{-1}$ . The surface area of an average egg is  $7.07 \times 10^{-6} \text{ m}^2$  (see Appendix 2 in supplementary material), so that the area-specific  $\text{O}_2$  flux was  $1.09 \times 10^{-6} \text{ mol s}^{-1} \text{ m}^{-2}$ . We have no direct measures of  $H_3$  or  $H_4$ , but estimate them as 10 and 3, respectively (Battino et al., 1983). Thus, the internal concentration of  $\text{O}_2$  will be 10% of saturation if  $k_m = 1.16 \times 10^{-6} \text{ m s}^{-1}$  and the overall resistance,  $1/k_m$ , is  $8.57 \times 10^5 \text{ s m}^{-1}$ . This value provides a benchmark for evaluating resistances of individual layers.

## Material and methods

### Animals

Eggs were derived from a laboratory colony of *Manduca sexta* L. All stages were exposed to a 14 h:10 h L:D photoperiod. Eggs, larvae and pupae were kept at 25°C and adults at 24°C. Adults were given 30% honey water and potted tobacco plants for oviposition. To facilitate egg collection, the adult scotophase was set to begin at 07:00 h.

### Microscopy

Both light and electron microscopy were used to measure aeropyle density and cross-sectional area. Density was measured on 10 isolated chorions washed gently in saline to remove yolk and other debris. Cleaned

chorions were mounted under oil and visualized with a Zeiss Axioplan2 compound microscope fitted with an ocular micrometer grid (400× magnification, at which the grid was 250 μm on a side, or 62,500 μm<sup>2</sup> total). On each chorion the grid was positioned randomly over 5–7 locations and the number of aeropyles within the grid was counted.

For scanning electron microscopy (SEM), fresh chorions were washed in saline and fixed overnight in 2% glutaraldehyde in sodium cacodylate buffer (200 mmol l<sup>-1</sup>, pH 7.4, 4°C). Subsequently, they were rinsed, dehydrated in an ethanol series and stored over desiccant at room temperature. Samples were then sputter-coated with gold, mounted and viewed (Hitachi S-4500 Field Emission SEM, 5 kV). On each of five eggs, 10 randomly picked aeropyles were photographed and two orthogonal diameters on each aeropyle image were measured using image analysis software (Scion Image v. beta 4.0.2, Scion Corporation, Frederick, MD, USA), from which cross-sectional areas could be calculated using the equation for the area of an ellipse.

### Inert gas substitution

The diffusion coefficient of gaseous  $\text{O}_2$  in a binary mixture depends on the molecular mass of the other gas. Air, for example, consists essentially of  $\text{O}_2$  and  $\text{N}_2$  and the diffusion coefficient of  $\text{O}_2$  in air,  $D_{\text{air}}$ , is  $2.09 \times 10^{-5} \text{ m}^2 \text{ s}^{-1}$ . If  $\text{N}_2$  (molecular mass 28) is replaced entirely by He (molecular mass 4) of the same partial pressure,  $D_{\text{air}}$  rises 2.2-fold to

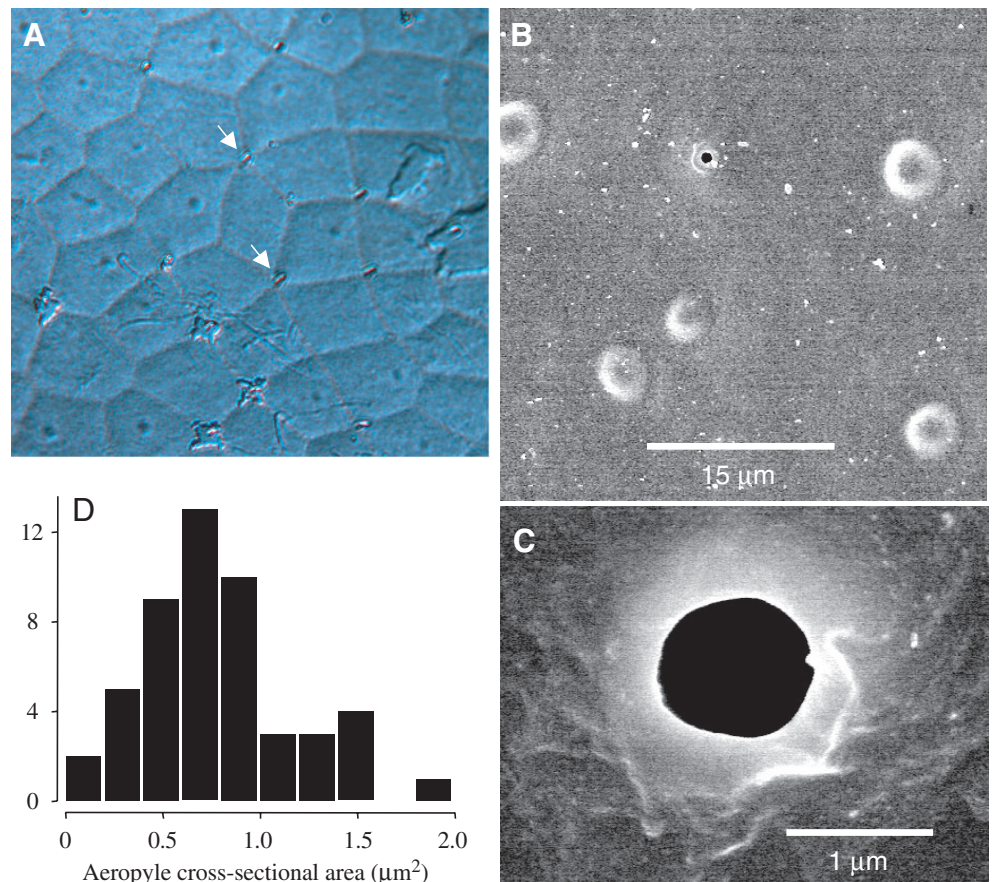

Fig. 2. Aeropyle density and cross-sectional area of eggs of *Manduca sexta*. (A) Light microscope view (400×, immersed in oil) of the surface of a chorion removed from the egg and washed in saline. Polygons are the imprints of the follicular cells that deposited the chorion (Orfanidou et al., 1992). White arrows point to two aeropyles; about 13 aeropyles are visible in this field. (B) SEM view of the outer surface of a chorion. Polygons are not visible, but dimples (see A) are. A single aeropyle is in the upper left quadrant. (C) Close up view of a single aeropyle. (D) Histogram of aeropyle cross-sectional areas. Data represent 10 aeropyles from each of five eggs ( $N=50$ ). Mean cross-sectional area ( $\pm$ S.E.M.) is  $0.775 \pm 0.054 \mu\text{m}^2$ .

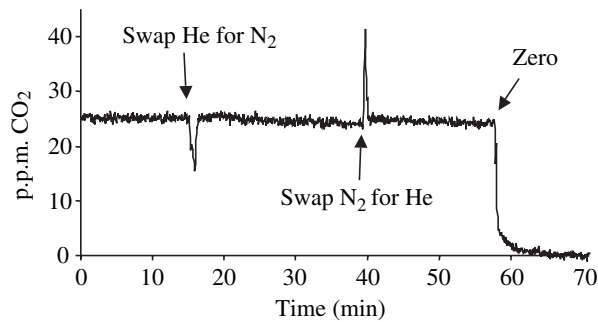

Fig. 3. Control trace demonstrating successful identification of a thermal conversion factor for switching between N<sub>2</sub> and He using a single mass-flow controller. The stream flowing through the CO<sub>2</sub> analyzer was composed of 5 ml min<sup>-1</sup> of a span gas (505 p.p.m. CO<sub>2</sub> in N<sub>2</sub>), 21 ml min<sup>-1</sup> O<sub>2</sub> and 74 ml min<sup>-1</sup> of either He or N<sub>2</sub> carrier. Using the identified conversion factor (1.37), we were able to switch between carrier gases without affecting the reading from the CO<sub>2</sub> analyzer (~25 p.p.m. CO<sub>2</sub>, which is 5% of 505 p.p.m.).

$4.60 \times 10^{-5} \text{ m}^2 \text{ s}^{-1}$ . Importantly, substitution of He for N<sub>2</sub> does not affect the diffusion of O<sub>2</sub> in liquids (e.g. water, yolk) or solids (e.g. wax). Therefore, if the chorion and trabecular layers really do not resist flux, then substituting He for N<sub>2</sub> should not rescue O<sub>2</sub>-starved eggs.

We tested this prediction by measuring metabolic rates while simultaneously manipulating O<sub>2</sub> content and the inert carrier identity of gas mixtures supplied to batches of eggs. Metabolic rate was measured as CO<sub>2</sub> emission using flow-through respirometry. Batches of eggs (*M. sexta*) that were either 1.5 or 3 days old and weighing between 330 and 690 mg (approximately 210–450 eggs per batch) were placed into a glass chamber (large enough so that the eggs were in a monolayer) and submerged in a temperature-controlled water bath set to a temperature (37°C) that we knew from previous work (Woods and Hill, 2004) gave maximal metabolic rates. To ensure that incoming air was thermally equilibrated, gas upstream of the chamber was first directed through 0.5 m of coiled, submerged, ¼-inch copper tubing. Gases were mixed from cylinders of pure O<sub>2</sub>, N<sub>2</sub> and He using calibrated mass flow controllers (2 Tylan FC-2900, Torrance, CA and UNIT UFC-1100, Yorba Linda, CA, USA) and mixing electronics (MFC-4, Sable Systems, Las Vegas, NV, USA). The gas stream (100 ml STPD min<sup>-1</sup>) was directed past the eggs, through a small volume of indicating Drierite to remove water vapour and into a carbon dioxide analyzer (CA-2A, Sable Systems), which was calibrated frequently with pure N<sub>2</sub> (zero) and 505 p.p.m. CO<sub>2</sub> in N<sub>2</sub> (span, Airgas, Radnor, PA, USA). Data were logged using Datacan V software (V5.4, Sable systems) receiving digital signals from an A/D converter (UI2, Sable Systems), which itself received analog signals from the instruments. In addition to CO<sub>2</sub>, we logged temperature in a separate chamber otherwise identical to the experimental chamber but fitted with a T-type thermocouple (connected to a TC-1000 thermocouple meter, Sable Systems).

Because flows of N<sub>2</sub> and He were both controlled by the same mass flow controller (factory-calibrated for N<sub>2</sub> flow), we

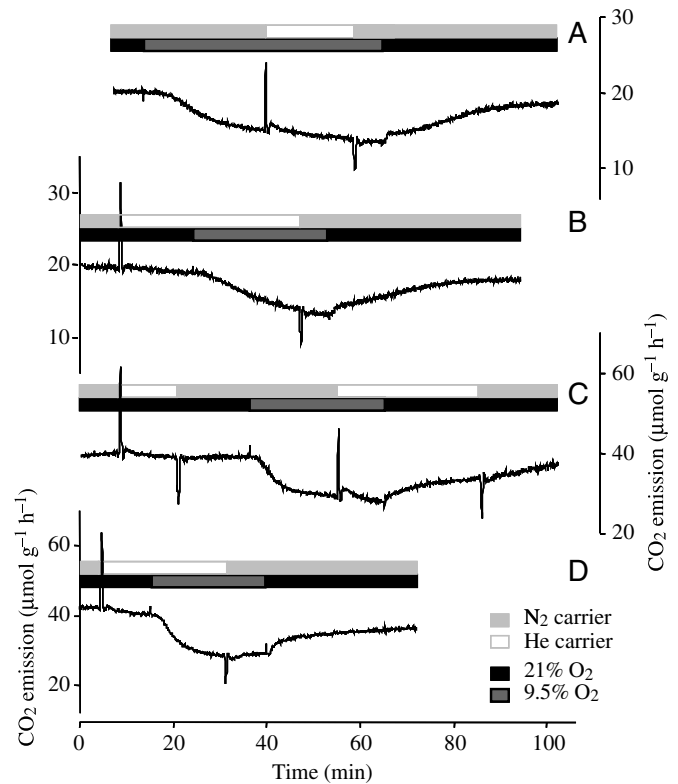

Fig. 4. CO<sub>2</sub> emission (at 37°C) by batches of *Manduca sexta* eggs either 1.5 d (A and B) or 3 day old (C and D). Each batch contained 210–450 eggs. Eggs were exposed, in series, to either 21 or 9.5% O<sub>2</sub> with either He or N<sub>2</sub> making up the balance. Only variation in O<sub>2</sub> availability affected metabolic rates; swapping carrier gases (which altered the diffusion coefficient of O<sub>2</sub> in the air filled parts of the chorion and trabecular layer) had no effect.

first needed to determine the appropriate thermal conversion factor. To do so, we generated a gas stream consisting of (all gas volumes STPD) 5 ml min<sup>-1</sup> span gas (505 p.p.m. CO<sub>2</sub> in N<sub>2</sub> controlled by a calibrated mass flow controller), 21 ml min<sup>-1</sup> O<sub>2</sub> and 74 ml min<sup>-1</sup> N<sub>2</sub> or He (through the same controller). By switching repeatedly between N<sub>2</sub> and He, we empirically identified a thermal conversion factor (1.37) that, in our system, gave identical readings from the CO<sub>2</sub> analyzer (~25 p.p.m. CO<sub>2</sub>, which is 5% of 505 p.p.m.).

Once the conversion factor was determined, we measured rates of CO<sub>2</sub> emission of batches of eggs that experienced, in series over 1–2 h, all four combinations of the following conditions: 21% O<sub>2</sub> in N<sub>2</sub>, 21% O<sub>2</sub> in He, 9.5% O<sub>2</sub> in N<sub>2</sub> and 9.5% O<sub>2</sub> in He.

#### *Rates of water loss before and after solvent extraction*

The three layers underneath the trabecular layer – a crystalline layer, a wax layer and the vitelline envelope – are represented together in the model by the term  $d_3H_3/D_3$ . Below we focus on the wax layer, primarily because experimental manipulations are feasible. However, the crystalline chorionic layer itself probably plays a role in controlling the diffusion of

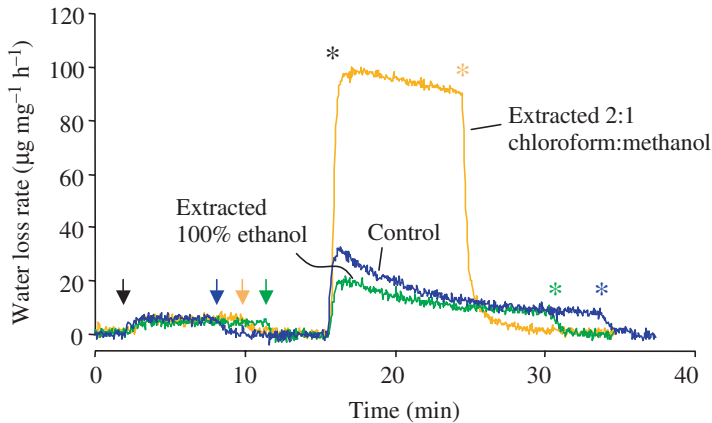

Fig. 5. Water loss (at 25°C) from batches of 2 day old *Manduca sexta* eggs. Each batch contained 40 eggs. The first few minutes of each trace represent a baseline reading (air stream directed through an empty chamber). Air streams were then redirected through the egg-containing chamber (black arrow) followed by another baseline reading (colored arrows). During the second baseline, batches were extracted for 1 min in 100% ethanol or 2:1 (v:v) chloroform:methanol, blotted dry and returned to their chambers. A control batch was not extracted. The air stream was then directed again through the egg-containing chamber (black asterisk), after which a final baseline reading (colored asterisks) was taken.

gases, as suggested by Papassideri and Margaritis (1996). The role of the vitelline envelope in gas flux is unknown.

Batches of 40 2-day-old eggs were placed into a water-jacketed, stainless-steel chamber (custom built) designed to interface with a gas multiplexer (TR-RM8, Sable Systems) (see Woods and Hill, 2004 for details). The chamber temperature was maintained at 25°C by a recirculating water bath. An air stream (50 ml min<sup>-1</sup>, dry, 21% O<sub>2</sub>, mixed from cylinders of pure O<sub>2</sub> and N<sub>2</sub>) was directed through the egg chamber, then past a thin-film capacitance humidity sensor (RH-100, Sable Systems) which had been calibrated with dry air (zero) and an air stream humidified to 2.336 kPa water vapour pressure (span; humidified by bubbling the stream through a flask of water held at 20°C).

To remove water vapour adhering to the egg surface, eggs were left in the chamber for ~30 min prior to measurement. Subsequently, a baseline reading was taken (through an empty chamber) and the air stream flowing past the eggs was sampled for ~5 min. This reading allowed calculation of the rate of water loss of unmanipulated eggs. During the subsequent baselining, the batch of eggs was removed from the water-jacketed chamber and extracted (room temperature) for 1 min with either chloroform:methanol (2:1 v:v; a general solvent for lipid extraction) or 100% ethanol (polar solvent), blotted briefly and returned to the chamber. After 2 min of flushing, the air stream was sampled again. A control batch was manipulated identically except that it was not exposed to solvent.

#### Developmental changes in metabolism and water loss

Data on artificial wax membranes indicate that wax permeability to O<sub>2</sub> may be very low (Donhowe and Fennema, 1993). These data suggest that the wax layer in insect eggshells may resist both water and oxygen flux. If metabolic demand for O<sub>2</sub> increases over development (which preliminary experiments showed was the case), embryos may thin or alter the wax layer to enhance O<sub>2</sub> delivery; if so, eggs should also lose water at higher rates towards the end of incubation. We tested this prediction by measuring metabolic rate (as CO<sub>2</sub> emission) while also measuring water loss rate over most of the period from laying to hatching.

Eggs of known synchronized age were obtained by introducing a potted tobacco plant into the adult mating cage for 2 h. Eggs were stripped from leaves, sorted randomly into three batches of 40, weighed and placed into water-jacketed (27°C) respirometry chambers within 6 h (maximum egg age 8 h). The flow-through system consisted of (calibrated) water vapour and CO<sub>2</sub> analyzers described above connected in series, with a small Drierite column between them. The air stream (dry, normoxic; 50 ml min<sup>-1</sup> STPD) was directed sequentially, *via* computer control of a gas multiplexer, through each of the sample chambers and a blank (baseline) chamber. Each chamber was sampled for 30 min, during which time the other three chambers were flushed continuously (50 ml min<sup>-1</sup> per chamber).

## Results

### External resistance to flux, $1/k_E$

Boundary layers of air around eggs, or around the leaves to which they are attached, may retard O<sub>2</sub> transfer enough to produce significant gradients. To evaluate this possibility, we model two physical situations – a free, spherical egg (not attached to any surface) and an egg attached to a flat plane (many insects, including *M. sexta*, attach eggs to leaves).

The equation for forced convection around a solid sphere (Cussler, 1997, p. 227) is given by:

$$\frac{k_E R}{D_{\text{air}}} = 1 + 0.3 \left( \frac{2Rv}{\nu} \right)^{\frac{1}{2}} \left( \frac{\nu}{D_{\text{air}}} \right)^{\frac{1}{3}}, \quad (7)$$

where  $v$  is bulk wind speed and  $\nu$  is kinematic viscosity of air. Rearranging to solve for  $k_E$  gives:

$$k_E = \frac{D_{\text{air}}}{R} \left[ 1 + 0.3 \left( \frac{2Rv}{\nu} \right)^{\frac{1}{2}} \left( \frac{\nu}{D_{\text{air}}} \right)^{\frac{1}{3}} \right]. \quad (8)$$

When there is no convection (i.e., no wind), this expression reduces to:

$$k_E = \frac{D_{\text{air}}}{R}, \quad (9)$$

which gives the minimum mass transfer coefficient



( $0.0279 \text{ m s}^{-1}$ ) under calm conditions (a maximum resistance of  $35.9 \text{ s m}^{-1}$ ). With convection the resistance is lower still.

It may be more realistic to model eggs attached to a leaf. The equation for laminar flow across a plate of length  $L$  (Cussler, 1997, p. 227) is:

$$\frac{k_E L}{D_{\text{air}}} = 0.646 \left( \frac{LV}{\nu} \right)^{\frac{1}{2}} \left( \frac{\nu}{D_{\text{air}}} \right)^{\frac{1}{3}} \quad (10)$$

Solving for  $k_E$  and assuming a leaf length of 0.1 m, we find that  $k_E$  is only about 10-fold lower than for forced convection around a sphere. Thus, neither assumed geometry nor wind speed gives a resistance more than 0.1% of the value calculated above.

#### Resistance of the chorion

In eggs of *M. sexta*, the chorion is  $\sim 7 \mu\text{m}$  thick ( $d_1 = 7 \times 10^{-6} \text{ m}$ ) (Orfanidou et al., 1992). If aeropyles have the same diameter (the diameter at the chorion's outer surface) for their entire length, the effective diffusion coefficient in the chorion is:

$$D_1 = \alpha D_{\text{air}}, \quad (11)$$

where  $\alpha$  is the fraction of the chorion surface area occupied by aeropyles. The average surface area of eggs from our colony,  $7.07 \times 10^{-6} \text{ m}^2$ , can be calculated directly from measures of egg shape (see Appendix 2 in Supplementary material).

Aeropyle density appeared not to vary with location on the eggshell. On average we counted 15.08 aeropyles per grid, giving an overall aeropyle density of  $2.41 \times 10^8$  aeropyles per  $\text{m}^2$ . The average egg thus contains 1703 aeropyles ( $= 2.41 \times 10^8$  aeropyles  $\text{m}^{-2} \times 7.07 \times 10^{-6} \text{ m}^2$ ). This value is lower than Orfanidou et al. (1992) suggested. They observed aeropyles (p. 738) "at periodic distances of approximately  $30 \mu\text{m}$ ", equivalent to  $\sim 1.6 \times 10^9$  aeropyles  $\text{m}^{-2}$  or about 10,000 aeropyles per egg. The cause of the discrepancy is unclear; we show below, however, that variation in aeropyle number between the two values has a negligible effect on resistance to gas flux.

Aeropyles were obvious at a number of scales (Fig. 2B,C). They appeared almost perfectly round and few (14%) were obstructed by any visible material. The average area of an aeropyle ( $\pm$ S.E.M.) was  $0.755 \pm 0.054 \mu\text{m}^2$ , in good agreement with Orfanidou et al. (1992), who visualized aeropyles of  $\sim 1.5 \mu\text{m}$  in diameter ( $1.76 \mu\text{m}^2$ ). Together with the estimated total number of aeropyles, we calculate that the average egg has approximately  $984 \mu\text{m}^2$  ( $9.84 \times 10^{-10} \text{ m}^2$ ) of aeropyle cross-sectional area. The fraction of total area occupied by aeropyles ( $\alpha$ ), therefore, is 0.000139.  $D_1$  is thus  $2.91 \times 10^{-9} \text{ m}^2 \text{ s}^{-1}$  and the resistance of the chorion,  $d_1/D_1$  is  $2409 \text{ s m}^{-1}$ . Higher numbers of aeropyles would give even lower resistances. The value is larger than the external resistance of boundary layers but still is less than 0.3% of the benchmark resistance ( $8.6 \times 10^5 \text{ s m}^{-1}$ ).

An objection is that we assumed aeropyles of uniform radius (cylinders), whereas they may actually taper as they approach

the inner surface of the chorion (as in e.g. the moth *Antheraea polyphemus*, Margaritis and Mazzini, 1998). The consequences of this shape for gas diffusion have been explored for bird eggshells by Tøien et al. (1987, 1988), with the general conclusion that the narrow, inner portion of the funnel accounts disproportionately for the overall resistance. In eggs of *M. sexta*, this effect may be important. However, if the aeropyle radius at the inner chorion were even threefold smaller, the resistance would still be small. An upper bound can be estimated by assuming that the entire radius was threefold less – in this case, the overall resistance to flux would be ninefold higher, or  $2.2 \times 10^4 \text{ s m}^{-1}$ . This value still only represents about 2.5% of the benchmark resistance.

#### Resistance of the trabecular layer

*A priori*, the thin trabecular layer ( $d_2 = 0.3 \mu\text{m}$ , or  $3 \times 10^{-7} \text{ m}$ ; Orfanidou et al., 1992) would seem not to provide much resistance – but it is worth a brief calculation nonetheless. The diffusion coefficient of  $\text{O}_2$  in the trabecular space can be estimated as:

$$D_2 = \frac{\epsilon D_{\text{air}}}{\tau}, \quad (12)$$

where  $\epsilon$  is the fraction of the trabecular space that is air and  $\tau$  is its tortuosity. The photographs of *M. sexta* eggs in Orfanidou et al. (1992) suggest that  $\epsilon$  is greater than 0.5.  $\tau$  is unknown, but most for most complex, porous solids, such as the trabecular layer, it is between 2 and 6 (Cussler, 1997, p. 173). Assuming  $\epsilon = 0.7$  and  $\tau = 4$ , we estimate that  $D_2 = 3.66 \times 10^{-6} \text{ m}^2 \text{ s}^{-1}$  and therefore that trabecular resistance,  $d_2/D_2 = 0.082 \text{ s m}^{-1}$ . The distance between pillars ( $h$ ) in the trabecular layer is small enough ( $0.1\text{--}0.2 \mu\text{m}$ ) that it approaches the mean free path of  $\text{O}_2$  in air ( $\lambda = 0.067 \mu\text{m}$  at room temperature). The kinetics of the diffusion process therefore lie near a transition point between Fickian and Knudsen regimes (Cussler, 1997). In Knudsen diffusion, molecules of  $\text{O}_2$  collide more often with walls than with other gas molecules. Here we ignore these effects, because Knudsen diffusion predominates only when  $h < \lambda$ .

#### Inert gas substitution

Because flows of both  $\text{N}_2$  and He were controlled by the same mass flow controller, we first empirically determined an appropriate thermal conversion factor (1.37). A typical control trace using this factor is shown in Fig. 3.

As shown in Fig. 4, only variation in  $\text{O}_2$  content affected metabolic rates. Swapping He for  $\text{N}_2$  did not rescue the depressed metabolic rates of eggs in hypoxia; nor did swapping  $\text{N}_2$  for He further depress metabolic rates of eggs already in hypoxia. This result did not depend on egg age.

#### Resistance of subchoral layers

Prior to extraction with organic solvents, all three batches of eggs had similarly low rates of water loss (Fig. 5;  $4\text{--}6 \mu\text{g mg}^{-1} \text{ h}^{-1}$ , comparable to values measured

gravimetrically by Woods and Singer, 2001). After extraction, water loss from the batch exposed to chloroform:methanol rose 18-fold to  $90 \mu\text{g mg}^{-1} \text{h}^{-1}$ . Control eggs and those extracted in 100% ethanol had rates of water loss that rose 4–6-fold before falling back to values only slightly above pre-extraction values. The initial rise likely represents water vapour that had adhered to the outer chorion during the eggs' brief removal from the chamber. The pattern of solvent effects is consistent with Slifer's (1948) solubility data on waxes extracted from eggshells of a grasshopper, *Melanoplus differentialis*, which she found to be soluble in chloroform but not alcohol.

#### Developmental changes in metabolism and water loss

In the first 40 h of development, rates of metabolism and water loss rates both were low (Fig. 6A). Thereafter, metabolic rates rose more-or-less continuously to the end of development; rates of water loss followed a similar trajectory.

These correlative data indicate that the layer or layers responsible for waterproofing the egg – probably wax – likely also resist the flux of metabolic gases. A more quantitative analysis is possible. Wax permeability to water vapour can be calculated under the following assumptions: (1) that the wax layer accounts for all of the resistance to water vapour in the eggshell; (2) that the vapour pressure gradient across the eggshell is 3.56 kPa (from saturation at 27°C to zero); (3) and that wax layer thickness is 50 nm ( $d_3$ ). If, like beeswax, eggshell waxes have an  $\text{O}_2$ :water vapour permeability ratio of 1.49% (Donhowe and Fennema, 1993), the permeability to  $\text{O}_2$  ( $K$ ) can then be calculated from water vapour permeabilities (averaged across the three batches). We then calculated the magnitude of the  $P_{\text{O}_2}$  gradient across the wax layer using the equation  $\Delta P_{\text{O}_2} = Jd_3/K$ , assuming that  $\text{O}_2$  influx ( $J$ ) is  $\text{CO}_2/0.84$  emission. These calculations indicate (Fig. 6B, solid line) that increasing permeability of the wax over development (shown by rising rates of water loss) largely offsets increasing metabolic demand – consequently, the  $P_{\text{O}_2}$  gradient stays near 10 kPa. Given the number assumptions underlying these values, they match up remarkably well with the  $\Delta P_{\text{O}_2}$  observed by Woods and Hill (2004) of 10–15 kPa in the first 100  $\mu\text{m}$  across the eggshell. Likewise, values for permeability, corresponding to resistances of  $10^5$ – $10^6 \text{ s m}^{-1}$ , match up well with the benchmark resistance. Additional calculations, using only a constant permeability (equivalent to that calculated at 32 h, a point of low permeability), show (Fig. 6B, dotted line) that eggshell permeability must increase if rising metabolic demand is not to create an impossibly large  $\Delta P_{\text{O}_2}$ .

#### Internal resistance to flux, $H_3H_4/k_1$

The resistance of layers beneath the vitelline envelope depends on the permeability of the serosal cuticle and the geometry, location and permeability of the embryo. One estimate of the mass transfer coefficient,  $k_1$ , is  $D_{\text{H}_2\text{O}}/L$ , where  $L$  is the distance from the eggshell to the embryo. *M. sexta* develop just under the chorion, wrapped around yolk to the interior (Dorn et al., 1987). Assuming a distance between eggshell layers and embryo of 75  $\mu\text{m}$  and that the diffusion

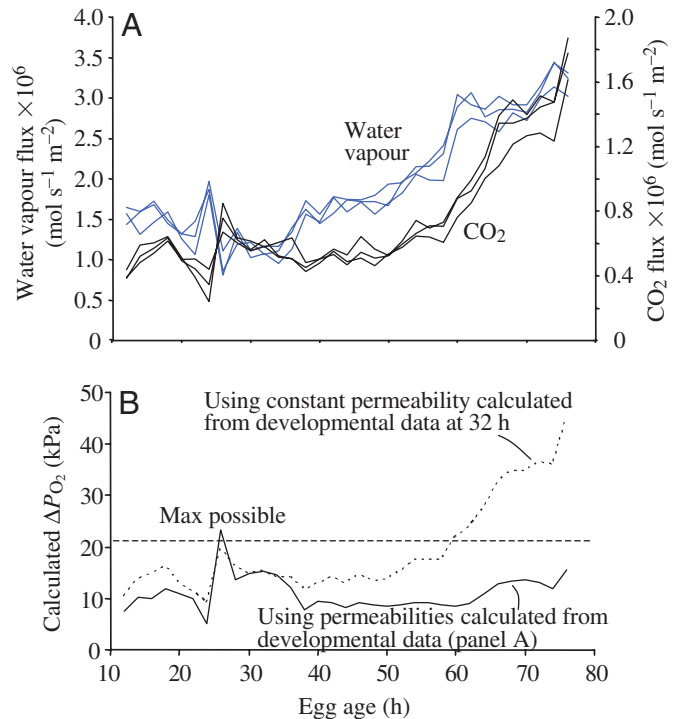

Fig. 6. (A)  $\text{CO}_2$  (black) and water vapour emission (blue) by three batches of eggs from laying to hatching (27°C). Each batch contained 40 eggs. (B) Calculated drop in  $P_{\text{O}_2}$  (in kPa) across the wax layer using permeabilities calculated from developmental data in panel A (solid) or from assuming a constant permeability equivalent to that calculated for eggs of age 32 h (see text for details). Because  $P_{\text{O}_2}$  at sea level is approximately 21 kPa, this value sets the upper bound on possible  $\Delta P_{\text{O}_2}$ .

coefficient of  $\text{O}_2$  in the intervening material is the same as its value in water ( $2.38 \times 10^{-9} \text{ m}^2 \text{ s}^{-1}$  at 25°C; Denny, 1993),  $k_1 = 3.17 \times 10^{-5} \text{ m}^1 \text{ s}^{-1}$  and the fifth resistance term,  $H_3H_4/k_1$ , is  $9.5 \times 10^5 \text{ s}^{-1} \text{ m}^{-1}$ , about 20% of the benchmark value. This value surely changes as serosal and larval cuticles form. Oxygen transport to the egg's center is even more difficult. If we set  $L$  to the egg's radius ( $\sim 0.75 \text{ mm}$ , or  $0.00075 \text{ m}$ ), then  $H_3H_4/k_1 = 9.5 \times 10^6 \text{ s}^{-1} \text{ m}^{-1}$ . This value is more than 100% of the calculated benchmark, indicating that diffusive  $\text{O}_2$  supply to central regions may be inadequate – although the metabolic density of yolk likely is much lower than of embryonic tissues. A detailed analysis of flux into the embryo and yolk will be forthcoming.

#### Discussion

The literature on insect eggshells is replete with suggestions that chorion morphology reflects the constraints of diffusive gas exchange (e.g. Chauvin and Barbier, 1972; Hinton, 1981; Margaritis, 1985; Papanikolaou et al., 1986; Daniel and Smith, 1994). It may well do so in species whose eggs lack aeropyles (e.g. *A. obtectus*; Biemont et al., 1981) or in species obtaining  $\text{O}_2$  through unusual structures, such as respiratory appendages (e.g. *Drosophila*). Our parameterized model, however, predicts

that the air-filled chorion and trabecular layer of *M. sexta* do not provide any significant resistance to O<sub>2</sub> flux, or to water vapour flux in the opposite direction. We tested this prediction directly using inert gas substitution (Dudley and Chai, 1996). This technique has been used by Paganelli et al. (1975) to examine diffusion of gases across eggshells of hens (*Gallus domesticus*) and by Birchard (2000) in a study of gas exchange by pupae of *Hylaphora cecropia* (Lepidoptera, Saturniidae). The prediction was confirmed – doubling the diffusion coefficient of O<sub>2</sub> in the chorionic and trabecular spaces by substituting He for N<sub>2</sub> did not rescue eggs whose metabolic rates had been depressed by an approximate twofold decrease in ambient O<sub>2</sub> availability. Most published estimates of aeropyle diameter, number and length for different species do not differ by more than an order of magnitude from our data on *M. sexta*, suggesting that for terrestrial eggs the chorion's irrelevance to gas exchange is general.

A recent claim to the contrary (Daniel and Smith, 1994) in fact supports this conclusion. The authors found that the size and shape of the single aeropyle in eggs of the beetle *Callosobruchus maculatus* was correlated with metabolic rate between strains – eggs from a Yemeni strain had both higher metabolic rates (2×) and shorter, wider aeropyles than a Brazilian strain. The authors argued that shorter, wider aeropyles are an adaptation to enhance O<sub>2</sub> flux. However, the drop in O<sub>2</sub> concentration from the top to the bottom of the aeropyle is insignificant regardless of strain. Using the Fick equation and values for rate of oxygen consumption and aeropyle morphology from Daniel and Smith (1994), it is straightforward to show that if the Yemeni strain had aeropyles of Brazilian dimensions, the [O<sub>2</sub>] at the bottom of the aeropyle would have been ~8.37 mol m<sup>-3</sup>. For comparison, air at 30°C (their test temperature) has a [O<sub>2</sub>] of 8.43 mol m<sup>-3</sup> (Denny, 1993).

Previous work on *M. sexta* in our laboratory (Woods and Hill, 2004) showed that the P<sub>O<sub>2</sub></sub> gradient across the eggshell is very steep, though the measurement resolution was not fine enough to detect gradients across individual layers. With the chorion and trabecular layers eliminated as candidates, the resistance must lie in one or more subchoral layers. Two observations implicate a wax layer specifically. First, extraction of eggs with chloroform:methanol (which extracts a broad range of lipids) led to markedly higher rates of water loss, suggesting that eggs of *M. sexta* are indeed waterproofed by wax. This conclusion does not exclude a role for the crystalline chorionic layer, which may also be destroyed by organic solvents. Second, from laying to hatching, rates of metabolism and water loss were strongly correlated. It appears that as metabolic rate increases embryos obtain adequate O<sub>2</sub> only by increasing the conductance of one or more layers, leading to higher rates of water loss. See Schmidt-Nielsen (1984) for a discussion of this tradeoff in bird eggs.

What remains is to develop a mechanistic view of how an oxygen–water tradeoff is manifest in subchoral layers. Previous work on waxes suggests the problem will not be trivial – even the problem of waterproofing alone has been

controversial (Lockey, 1988). Beament (1945, 1961, 1968) championed the idea that resistance to water flux through thin wax layers stems not from the properties bulk wax but from a single monolayer of polar lipid molecules interacting with and organized by a substrate, i.e. the cuticle. The monolayer hypothesis, however, has since been criticized on a number of fronts (Gilby and Cox, 1963; Lockey, 1976; Toolson et al., 1979; Machin, 1980). More recent work (Gibbs, 1998, 2002) has focused on the effects of lipid chain length and structure on phase transitions, finding that phase behaviour is a major factor influencing cuticular permeability. These latter results suggest that bulk properties of wax layers, rather than interaction with a substrate, determine their permeability to water. Complications in this model arise from the behaviour of 'bulk waxes' – which if they contain many different lipid species can exist in multiple alternative packing arrangements or as separate, coexisting solid and liquid phases (Gibbs, 1998). How O<sub>2</sub> moves across such heterogeneous material is of particular interest.

In insect eggshells specifically, interactions between waxes and the crystalline chorionic layer may also occur (Margaritis et al., 1980). Major structural units in the crystalline layer are arranged periodically at intervals of 8–10 nm and smaller units at 3.5–5.5 nm (Margaritis, 1985); the open distances between units appear to be as low as 1 or 2 nm (Margaritis et al., 1984; Margaritis and Mazzini, 1998). The scale of these features is of the same order as the physical dimensions of individual wax molecules. For comparison, a straight-chain alkane containing *n* carbon atoms has a length of  $(n-1)*1.27 \text{ \AA}$  (1 nm=10 Å) between terminal carbons (Ocko et al., 1997). Thus a C-27 alkane would have a length of about 33 Å (3.3 nm), long enough to bridge spaces within the crystal lattice. It would also be narrow enough to intercalate into the crystal. Alternatively, polar lipids could be organized by interaction with polar sites on the surface of the crystalline layer (*à la* Beament). A still more radical hypothesis is that the crystalline layer itself is responsible for most of the waterproofing *and* most of the resistance to O<sub>2</sub> flux. Evaluating this last idea will require more detailed information, presently unavailable, on the sequences and arrangement of crystalline proteins.

Our work has both ecological and evolutionary implications. First, the wax layer and possibly also the vitelline envelope and crystalline chorionic layers, are the physical locus of a tradeoff between oxygen influx and water vapour efflux. Studies examining the physiological ecology of insect eggs (i.e. relationships among geographic distributions, eggshell structure, desiccation resistance and temperature-associated oxygen shortage) should focus explicitly on these subchoral layers. Second, the division of labor among eggshell layers – the chorion functioning to protect subchoral layers and embryo from mechanical threats (Hinton, 1981) and the subchoral layers controlling the fluxes of water, oxygen and carbon dioxide – indicates that the two sets of layers may be functionally and genetically decoupled over evolutionary time and likely are shaped by distinct sets of selection pressures.

We thank John Mendenhall, Michael Schmerling and the Texas Materials Institute (University of Texas at Austin) for SEM support and Dave Parichy for access to a compound light microscope. Two anonymous reviewers provided comments that substantially clarified the work. This work was supported by The University of Texas at Austin and a grant from the National Science Foundation to H.A.W. (IBN-0213087).

## References

- Alleyne, M., Chappell, M. A., Gelman, D. B. and Beckage, N. E. (1997). Effects of parasitism by the braconid wasp *Cotesia congregata* on metabolic rate in host larvae of the tobacco hornworm *Manduca sexta*. *J. Insect Physiol.* **43**, 143-154.
- Barbier, R. and Chauvin, G. (1974). Ultrastructure et rôle des aéropyles et des enveloppes de l'oeuf de *Galleria mellonella*. *J. Insect Physiol.* **20**, 809-820.
- Barbier, R. and Chauvin, G. (1977). Déterminisme de la transformation de l'enveloppe vitelline des oeufs de Lépidoptères. *Inter. J. Insect Morphol. Embryol.* **6**, 171-179.
- Battino, R., Rettich, T. R. and Tominaga, T. (1983). The solubility of oxygen and ozone in liquids. *J. Phys. Chem. Ref. Data*, **12**, 163-178.
- Beament, J. W. L. (1945). The cuticular lipoids of insects. *J. Exp. Biol.* **21**, 115-131.
- Beament, J. W. L. (1946). The waterproofing process in eggs of *Rhodnius prolixus* Stål. *Proc. Roy. Soc. Lond. B* **133**, 407-418.
- Beament, J. W. L. (1961). The water relations of insect cuticle. *Biol. Rev.* **36**, 281-320.
- Beament, J. W. L. (1968). Lipid layers and membrane models. In *Insects and Physiology* (ed. J. W. L. Beament and J. E. Treherne). New York: American Elsevier Publishing Company.
- Berger-Twelbeck, P., Hofmeister, P., Emmling, S. and Dorn, A. (2003). Ovicide-induced serosa degeneration and its impact on embryonic development in *Manduca sexta* (Insecta: Lepidoptera). *Tissue Cell* **35**, 101-112.
- Biomont, J. C., Chauvin, G. and Hamon, C. (1981). Ultrastructure and resistance to water loss in eggs of *Acanthoscelides obtectus* Say (Coleoptera: Bruchidae). *J. Insect Physiol.* **1981**, 667-679.
- Birchard, G. F. (2000). The effect of changing the gaseous diffusion coefficient on the mass loss pattern of *Hyalophora cecropia* pupae. *Physiol. Biochem. Zool.* **73**, 488-493.
- Buckner, J. S., Nelson, D. R., Fatland, C., Hakk, H. and Pomonis, J. G. (1984). Novel surface lipids of diapausing *Manduca sexta* pupae. *J. Biol. Chem.* **259**, 8461-8470.
- Chauvin, G. and Barbier, R. (1972). Perméabilité et ultrastructures des oeufs de deux Lépidoptères Tineidae: *Monopis rusticella* et *Trichophaga tapetzella*. *J. Insect Physiol.* **18**, 1447-1462.
- Cruickshank, W. J. (1972). Ultrastructural modifications in the follicle cells and egg membranes during development of flour moth oocytes. *J. Insect Physiol.* **18**, 485-498.
- Cussler, E. L. (1997). *Diffusion: Mass Transfer in Fluid Systems*, 2nd edn. Cambridge: Cambridge University Press.
- Daniel, S. H. and Smith, R. H. (1994). Functional anatomy of the egg pore in *Callosobruchus maculatus*: a trade-off between gas-exchange and protective functions? *Physiol. Entomol.* **19**, 30-38.
- Denny, M. W. (1993). *Air and Water*. Princeton: Princeton University Press.
- Donhowe, I. G. and Fennema, O. (1993). Water vapor and oxygen permeability of wax films. *J. Am. Oil Chem. Soc.* **70**, 867-873.
- Dorn, A., Bishoff, S. T. and Gilbert, L. I. (1987). An incremental analysis of the embryonic development of the tobacco hornworm, *Manduca sexta*. *Inter. J. Invert. Reprod. Develop.* **11**, 137-158.
- Dudley, R. and Chai, P. (1996). Animal flight mechanics in physically variable gas mixtures. *J. Exp. Biol.* **199**, 1881-1885.
- Fehrenbach, H. (1995). Egg shells of Lepidoptera – fine structure and phylogenetic implications. *Zoologischer Anzeiger* **234**, 19-41.
- Fehrenbach, H., Dittrich, V. and Zissler, D. (1987). Eggshell fine structure of three lepidopteran pests: *Cydia pomonella* (L.) (Tortricidae), *Heliothis virescens* (Fabr.) and *Spodoptera littoralis* (Boisd.) (Noctuidae). *Inter. J. Insect Morphol. Embryol.* **16**, 201-219.
- Furneaux, P. J. S. and Mackay, A. L. (1972). Crystalline protein in the chorion of insect eggshells. *J. Ultrastruct. Res.* **38**, 343-359.
- Gibbs, A. G. (1998). Water-proofing properties of cuticular lipids. *Am. Zool.* **38**, 471-482.
- Gibbs, A. G. (2002). Lipid melting and cuticular permeability: new insights into an old problem. *J. Insect Physiol.* **48**, 391-400.
- Gilby, A. R. and Cox, M. E. (1963). The cuticular lipids of the cockroach *Periplaneta americana* (L.). *J. Insect Physiol.* **9**, 671-681.
- Hartley, J. C. (1971). The respiratory system of the egg-shell of *Homorocoryphus nitidulus vicinus* (Orthoptera, Tettigoniidae). *J. Exp. Biol.* **55**, 165-176.
- Hinton, H. E. (1981). *Biology of Insect Eggs*, Vol. 1. Oxford: Pergamon Press.
- Lamer, A. and Dorn, A. (2001). The serosa of *Manduca sexta* (Insecta, Lepidoptera): ontogeny, secretory activity, structural changes and functional considerations. *Tissue Cell* **33**, 580-595.
- Lockey, K. H. (1976). Cuticular hydrocarbons of *Locusta*, *Schistocerca* and *Periplaneta* and their role in waterproofing. *Insect Biochem.* **6**, 457-472.
- Lockey, K. H. (1988). Lipids of the insect cuticle: origin, composition and function. *Comp. Biochem. Physiol. B* **89**, 595-645.
- Machin, J. (1980). Cuticle water relations: towards a new cuticle waterproofing model. In *Insect Biology in the Future: 'VBW 80'* (ed M. Locke and D. S. Smith), pp. 79-105. New York: Academic Press.
- Margaritis, L. H. (1985). Structure and physiology of the eggshell. In *Comprehensive Insect Physiology, Biochemistry and Pharmacology*, vol. 1 (ed. G. A. Kerkut and L. I. Gilbert), pp. 153-230. Oxford: Pergamon Press.
- Margaritis, L. H., Hamodrakas, S. J., Arad, T. and Leonard, K. R. (1984). Three-dimensional reconstruction of innermost chorion layer in *Drosophila melanogaster*. *Biol. Cell* **52**, 279-284.
- Margaritis, L. H., Kafatos, F. C. and Petri, W. H. (1980). The egg-shell of *Drosophila melanogaster*. Fine structure of the layers and regions of the wild-type egg-shell. *J. Cell Sci.* **43**, 1-35.
- Margaritis, L. H. and Mazzini, M. (1998). Structure of the egg. In *Microscopic Anatomy of the Invertebrates, Insecta*, vol. 11C (ed. F. W. Harrison, M. Locke), pp. 995-1037. New York: Wiley Liss.
- Margaritis, L. H., Petri, W. H. and Wyman, A. R. (1979). Structure and image analysis of a crystalline layer from Dipteran egg-shell. *Cell Biol. Int. Rep.* **3**, 61-67.
- Nelson, D. R. and Sukkestad, D. R. (1970). Normal and branched aliphatic hydrocarbons from the eggs of the tobacco hornworm. *Biochemistry* **9**, 4601-4611.
- Nelson, D. R. and Leopold, R. A. (2003). Composition of the surface hydrocarbons from the vitelline membranes of dipteran embryos. *Comp. Biochem. Physiol. B* **136**, 295-308.
- Ocko, B. M., Wu, Z., Sirota, E. B., Sinha, S. K., Gang, O. and Deutsch, M. (1997). Surface freezing in chain molecules: Normal alkanes. *Phys. Rev. E* **55**, 3164-3182.
- Orfanidou, C. C., Hamodrakas, S. J., Margaritis, L. H., Galanopoulos, V. K., Dedieu, J. C. and Gulik-Krzywicki, T. (1992). Fine structure of the chorion of *Manduca sexta* and *Sesamia nonagrioides* as revealed by scanning electron microscopy and freeze-fracturing. *Tissue Cell* **24**, 735-744.
- Paganelli, C. V. (1980). The physics of gas exchange across the avian eggshell. *Am. Zool.* **20**, 329-338.
- Paganelli, C. V., Ar, A., Rahn, H. and Wangenstein, O. D. (1975). Diffusion in the gas phase: the effects of ambient pressure and gas composition. *Resp. Physiol.* **25**, 247-258.
- Papanikolaou, A. M., Margaritis, L. H. and Hamodrakas, S. J. (1986). Ultrastructural analysis of chorion formation in the silkworm *Bombyx mori*. *Can. J. Zool.* **64**, 1158-1173.
- Papassideri, I. S. and Margaritis, L. H. (1996). The eggshell of *Drosophila melanogaster*: IX. Synthesis and morphogenesis of the innermost chorionic layer. *Tissue Cell* **28**, 401-409.
- Papassideri, I., Margaritis, L. H. and Gulik-Krzywicki, T. (1991). The egg-shell of *Drosophila melanogaster* VI. Structural analysis of the wax layer in laid eggs. *Tissue Cell* **23**, 567-575.
- Papassideri, I. S., Trougakos, I. P., Leonard, K. R. and Margartis, L. H. (2003). Structure and biochemical analysis of the *Leptinotarsa decemlineata* (Coleoptera; Chrysomeloidea) crystalline chorionic layer. *J. Insect Physiol.* **49**, 377-384.
- Rahn, H. and Ar, A. (1974). The avian egg: incubation time and water loss. *Condor* **76**, 147-152.
- Salkeld, E. H. (1973). The chorionic architecture and shell structure of *Amathes c-nigrum* (Lepidoptera: Noctuidae). *Can. Entomol.* **105**, 1-10.
- Schmidt-Nielsen, K. (1984). *Scaling: Why is Animal Size So Important?* Cambridge: Cambridge University Press.
- Schreuders, P. D., Kassis, J. N., Cole, K. W., Schneider, U., Mahowald, A.

- P. and Mazur, P.** (1996). The kinetics of embryo drying in *Drosophila melanogaster* as a function of the steps in permeabilization: experimental. *J. Insect Physiol.* **42**, 501-516.
- Slifer, E. H.** (1948). Isolation of a wax-like material from the shell of the grasshopper egg. *Disc. Faraday Soc.* **3**, 182-187.
- Telfer, W. H. and Smith D. S.** (1970). Aspects of egg formation. *Symp. Roy. Entomol. Soc. Lond.* **5**, 117-134.
- Thorpe, W. H. and Crisp, D. J.** (1947). Studies on plastron respiration II. The respiratory efficiency of the plastron in *Aphelocheirus*. *J. Exp. Biol.* **24**, 270-303.
- Tøien, Ø., Paganelli, C. V., Rahn, H. and Johnson, R. R.** (1987). The influence of eggshell pore shape on gas diffusion. *J. Exp. Zool. Suppl.* **1**, 181-186.
- Tøien, Ø., Paganelli, C. V., Rahn, H. and Johnson, R. R.** (1988). Diffusive resistance of avian eggshell pores. *Resp. Physiol.* **74**, 345-354.
- Toolson, E. C., White, T. R. and Glaunsinger, W. S.** (1979). Electron paramagnetic resonance spectroscopy of spin-labelled cuticle of *Centruroides sculpturatus* (Scorpiones: Buthidae): correlation with thermal effects on cuticular permeability. *J. Insect Physiol.* **25**, 271-275.
- Tuft, P. H.** (1950). The structure of the insect egg-shell in relation to the respiration of the embryo. *J. Exp. Biol.* **26**, 22-34.
- Wangensteen, O. D. and Rahn, H.** (1970/71). Respiratory exchange by the avian embryo. *Resp. Physiol.* **11**, 31-45.
- Wangensteen, O. D., Wilson, D. and Rahn, H.** (1970/71). Diffusion of gases across the shell of the hen's egg. *Resp. Physiol.* **11**, 16-30.
- Woods, H. A. and Hill, R. I.** (2004). Temperature-dependent oxygen limitation in insect eggs. *J. Exp. Biol.* **207**, 2267-2276.
- Woods, H. A. and Singer, M. S.** (2001). Contrasting responses to desiccation and starvation by eggs and neonates of two Lepidoptera. *Physiol. Biochem. Zool.* **74**, 594-606.
